# Supplementary material for: Aqueous synthesis of Li2MnAO4/C (A = Si, Ge) as positive electrode active materials for lithium-ion batteries by acid–base reaction
Source: Royal Society of Chemistry journal article supplement (doi:10.1039/d3nj03340f), 2023-01-01
Supplement: d3nj03340f1.pdf [file d3nj03340f1.pdf]

## Supporting information

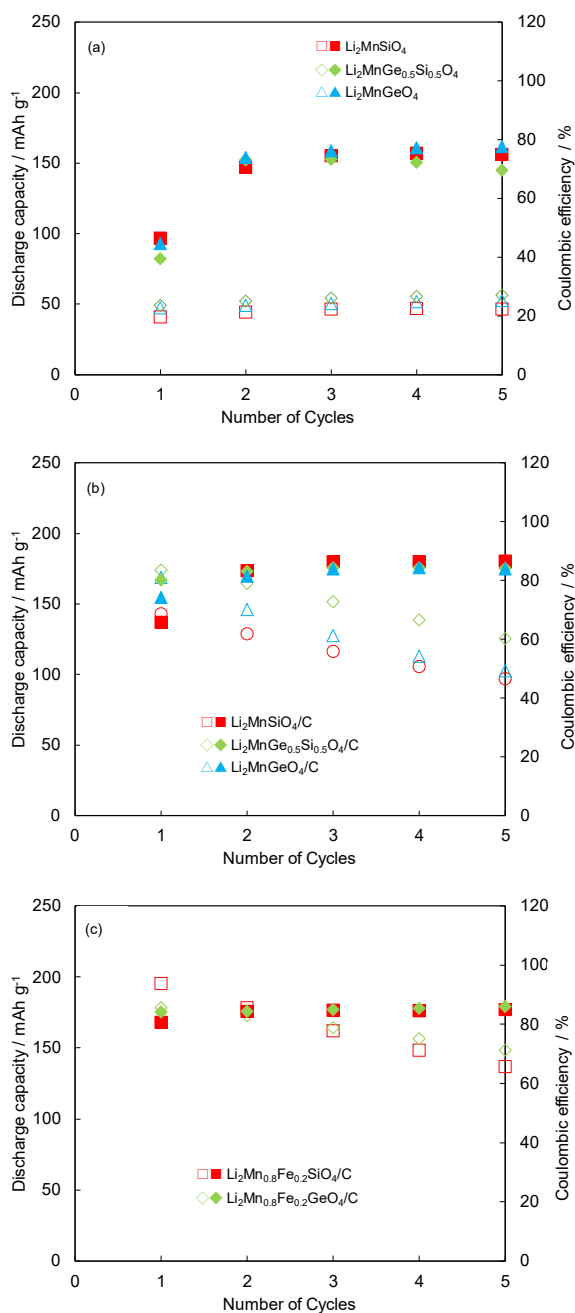

**Figure S1.** Cycling performances of  $\text{Li}_2\text{MnGe}_x\text{Si}_{1-x}\text{O}_4$  ( $x = 0, 0.5, 1.0$ ) (a),  $\text{Li}_2\text{MnGe}_x\text{Si}_{1-x}\text{O}_4/\text{C}$  ( $x = 0, 0.5, 1.0$ ) (b), and  $\text{Li}_2\text{Mn}_{0.8}\text{Fe}_{0.2}\text{AO}_4/\text{C}$  ( $A = \text{Si}, \text{Ge}$ ) (c). In (a), (b), and (c), hollow markers represent discharge capacities and solid markers represent coulombic efficiencies.

Table S1.  $\text{Li}_2\text{MnSiO}_4$  preparation methods and their properties.

|           | Compound                             | Synthesis method                   | Solvent                                      | Primary particle size | Initial discharge capacity                                     | loading weight of active material |
|-----------|--------------------------------------|------------------------------------|----------------------------------------------|-----------------------|----------------------------------------------------------------|-----------------------------------|
| Ref. 1    | $\text{Li}_2\text{MnSiO}_4/\text{C}$ | solid-state reaction               | water                                        | 20–50 nm              | 268 mA h g <sup>-1</sup><br>(0.05 C, RT)                       | 2-5 mg cm <sup>-2</sup>           |
| Ref. 2    | $\text{Li}_2\text{MnSiO}_4/\text{C}$ | solid-state reaction               | water<br>ethanol                             | not described         | 105 mA h g <sup>-1</sup><br>(0.05 C, RT)                       | 6-10 mg cm <sup>-2</sup>          |
| Ref. 3    | $\text{Li}_2\text{MnSiO}_4/\text{C}$ | sol-gel method                     | water<br>ethanol                             | not described         | 250 mA h g <sup>-1</sup><br>(0.05 C, RT)                       | 1-1.3 mg cm <sup>-2</sup>         |
| Ref. 4    | $\text{Li}_2\text{MnSiO}_4/\text{C}$ | sol-gel method                     | water<br>ethanol                             | 20–30 nm              | 240 mA h g <sup>-1</sup><br>(8 mA g <sup>-1</sup> , RT)        | 1-1.2 mg cm <sup>-2</sup>         |
| Ref. 5    | $\text{Li}_2\text{MnSiO}_4/\text{C}$ | emulsification +<br>sol-gel method | Water<br>1-butanol<br>cyclohexane<br>ethanol | ~200 nm cube          | 290 mA h g <sup>-1</sup><br>(0.02 C, 40 °C)                    | N. A.                             |
| Ref. 6    | $\text{Li}_2\text{MnSiO}_4/\text{C}$ | hydrothermal method                | water<br>PEG                                 | 10-40 nm              | 188 mA h g <sup>-1</sup><br>(10 mA g <sup>-1</sup> , N. A.)    | 1.8–2.2 mg cm <sup>-2</sup>       |
| Ref. 7    | $\text{Li}_2\text{MnSiO}_4/\text{C}$ | hydrothermal method                | water                                        | pore sizes<br>9–12 nm | 217 mA h g <sup>-1</sup><br>(0.1C, N.A.)                       | N. A.                             |
| Ref. 8    | $\text{Li}_2\text{MnSiO}_4/\text{C}$ | hydrothermal method                | water                                        | 200–400 nm<br>(rod)   | 275 mA h g <sup>-1</sup><br>(0.05 C, RT)                       | 1.2–2.4 mg cm <sup>-2</sup>       |
| Ref. 9    | $\text{Li}_2\text{MnSiO}_4/\text{C}$ | ionothermal synthesis              | ionic liquid                                 | 150-250 nm            | 218 mA h g <sup>-1</sup><br>(0.1 C, RT)                        | 10–12 mg                          |
| This work | $\text{Li}_2\text{MnSiO}_4/\text{C}$ | aqueous synthesis                  | water                                        | not described         | 143 mA h g <sup>-1</sup><br>(0.13 mA cm <sup>-2</sup> , 25 °C) | 14.5 mg cm <sup>-2</sup>          |

## References

1. J. Liu, H.-Y. Xu, X.-L. Jiang, J. Yang and Y.-T. Qian, *J. Power Sources*, 2013, **231**, 39–43.
2. V. Aravindan, K. Karthikeyan, K. S. Kang, W. S. Yoon, W. S. Kim and Y. S. Lee, *J. Mater. Chem.*, 2011, **14**, 2470–2475.
3. S. Devaraj, M. Kuezma, C.-T. Ng and P. Balaya, *Electrochim. Acta*, 2013, **102**, 290–298.
4. L. Qu, S.-H. Fang, L. Yang and S.-I. Hirano, *J. Power Sources*, 2014, **252**, 169–175.
5. Xian-Feng Yang, Jin-Hua Yang, Karim Zaghib, Michel L. Trudeau, Jackie Y. Ying, *Nano Energy*, 2015, **12**, 305-313.

6. Meetesh Singh, Nagesh Kumar, Yogesh Sharma, *J. Power Sources*, 2022, **542**, 231630.
7. M. Xie , R. Luo , R. Chen , F. Wu , T. Zhao , Q. Wang and L. Li , *ACS Appl. Mater. Interfaces*, 2015, **7**, 10779-10784.
8. Y. Pei , Q. Chen , C.-Y. Xu , H.-X. Wang , H.-T. Fang , C. Zhou , L. Zhen and G.-Z. Cao , *J. Mater. Chem. A*, 2016, **4**, 9447-9454.
9. X.-L. Li , Y.-F. Liu , Z.-H. Xiao , W. Guo and R. Zhang , *Ceram. Int.*, 2014, **40**, 289-296.
